# Supplementary material for: Inhibition of p66Shc Oxidative Signaling via CA-Induced Upregulation of miR-203a-3p Alleviates Liver Fibrosis Progression
Source: PubMed Central journal article supplement — Mol Ther Nucleic Acids. 2020 Jul 10;21:751–63. doi: 10.1016/j.omtn.2020.07.013 (PMC7417942; doi:10.1016/j.omtn.2020.07.013), 2020-07-10
Supplement: mmc1.pdf [file mmc1.pdf]

OMTN, Volume 21

## **Supplemental Information**

**Inhibition of p66Shc Oxidative Signaling via**

**CA-Induced Upregulation of miR-203a-3p**

**Alleviates Liver Fibrosis Progression**

**Zhecheng Wang, Yan Zhao, Huanyu Zhao, Junjun Zhou, Dongcheng Feng, Fan Tang, Yang Li, Li Lv, Zhao Chen, Xiaodong Ma, Xiaofeng Tian, and Jihong Yao**

## Supplemental data

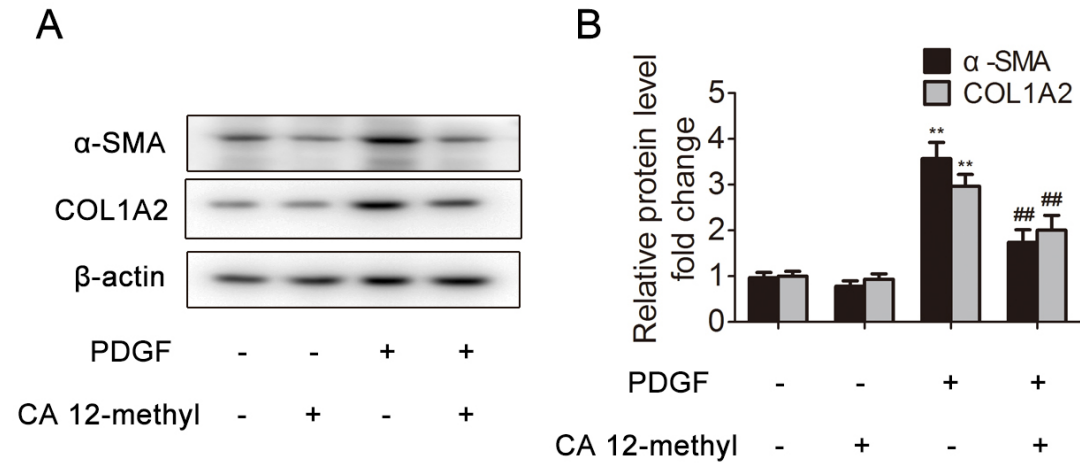

**Suppl. Fig 1:** 12-O-Methylcarnosic acid ameliorates HSC activation. LX-2 cells were treated with 12-O-methylcarnosic acid, PDGF-BB or nothing. (A, B)  $\alpha$ -SMA and COL1A2 protein expression in the liver; n=3. \*\* $P < 0.01$  vs. the control group; ## $P < 0.01$  vs. the PDGF group.

## 大连医科大学医学伦理审查意见

我校 姚继红教授申请的国家自然科学基金面上基金项目《p66Shc在肝纤维化发病中的作用及lncRNA-Mical2/miR-203a-3p对其调控研究》，校医学伦理委员会对该项目相关医学伦理学问题进行了审查。

经校医学伦理委员会审议，该项目的实验设计和实施方案充分考虑了安全性和公平性原则，研究内容不构成对受试者的伤害和风险，受试者的招募将安全基于自愿和知情同意原则，并尽最大限度保护受试者的隐私，研究内容和结果不存在利益冲突。符合伦理原则，同意该项目按研究计划执行。

大连医科大学医学伦理委员会

2017年3月3日

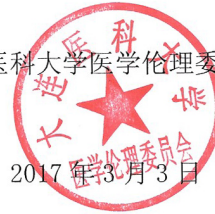

**Suppl. Fig 2:** Table of ethics approval from the Institutional Ethics Committee of Dalian Medical University.

Fig.1A

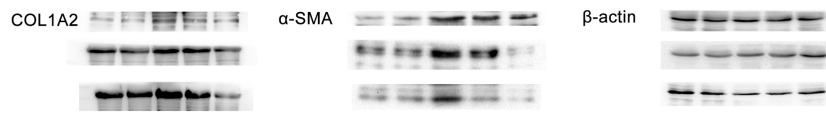

Fig.2A

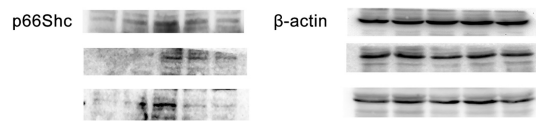

Fig.2B

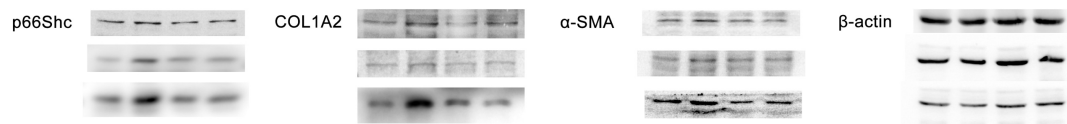

Fig.3D

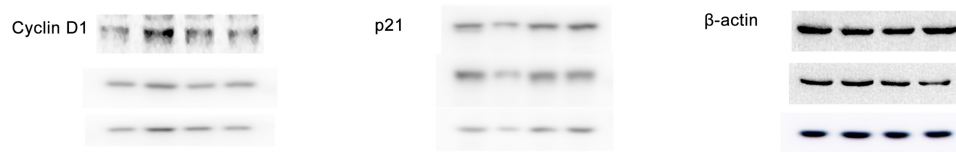

Fig.4A

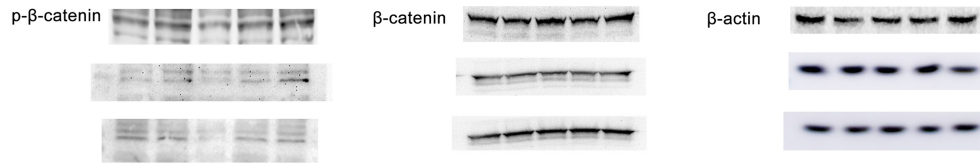

Fig.4B

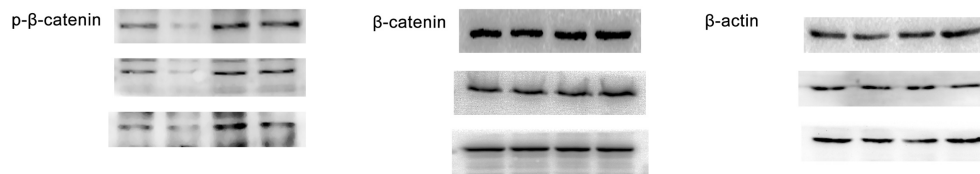

Fig.4C

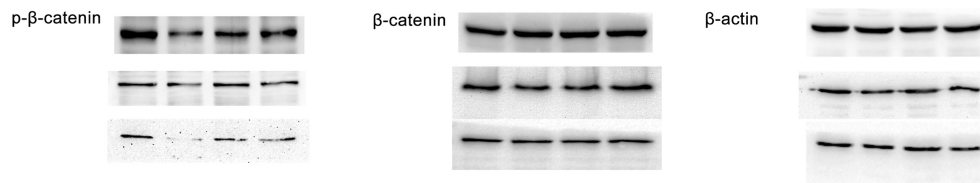

Fig.4D

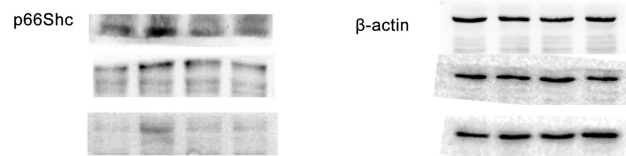

Fig.4E

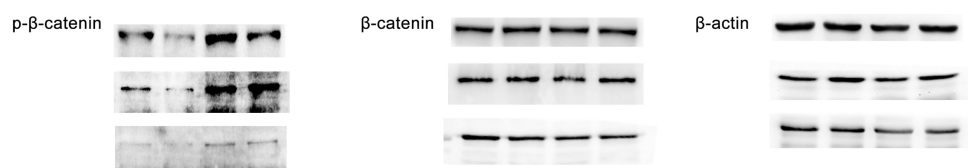

Fig.4F

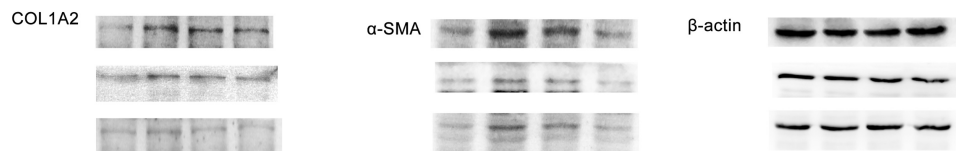

Fig.6F

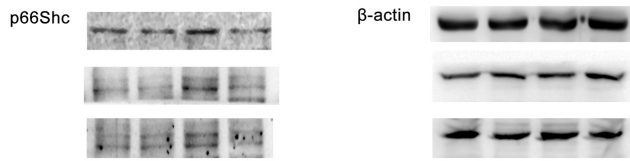

Fig.6G

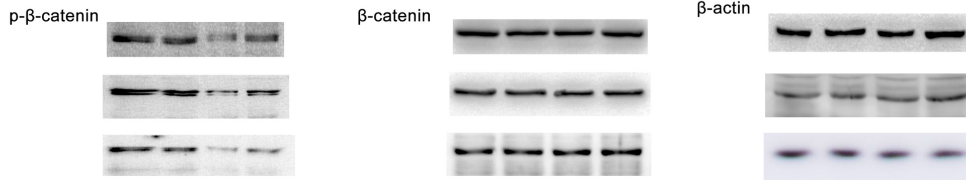

Fig.7B

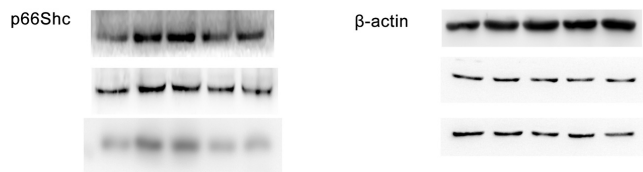

Fig.7C

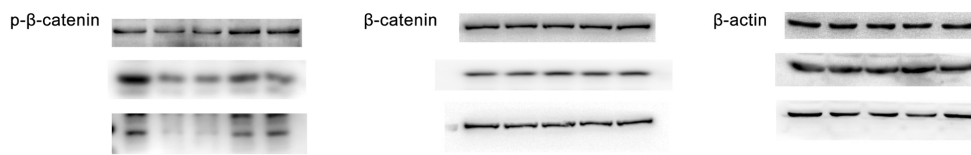

Fig.7D

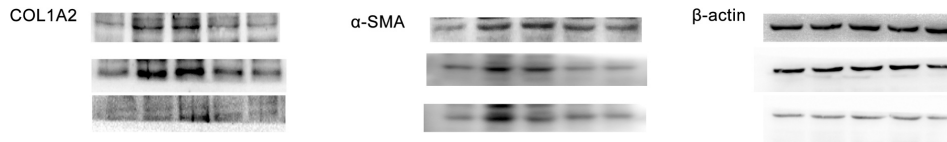

Fig.7F

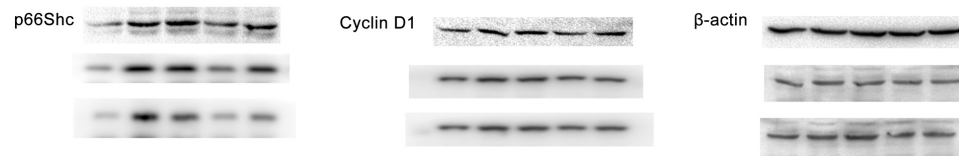

Fig.7G

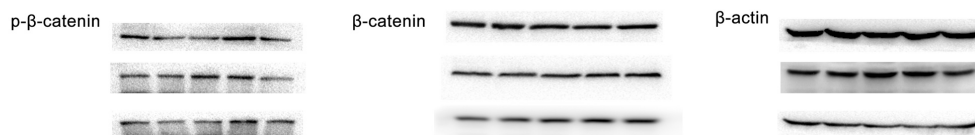

Fig.7H

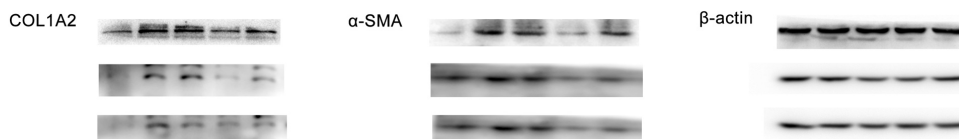

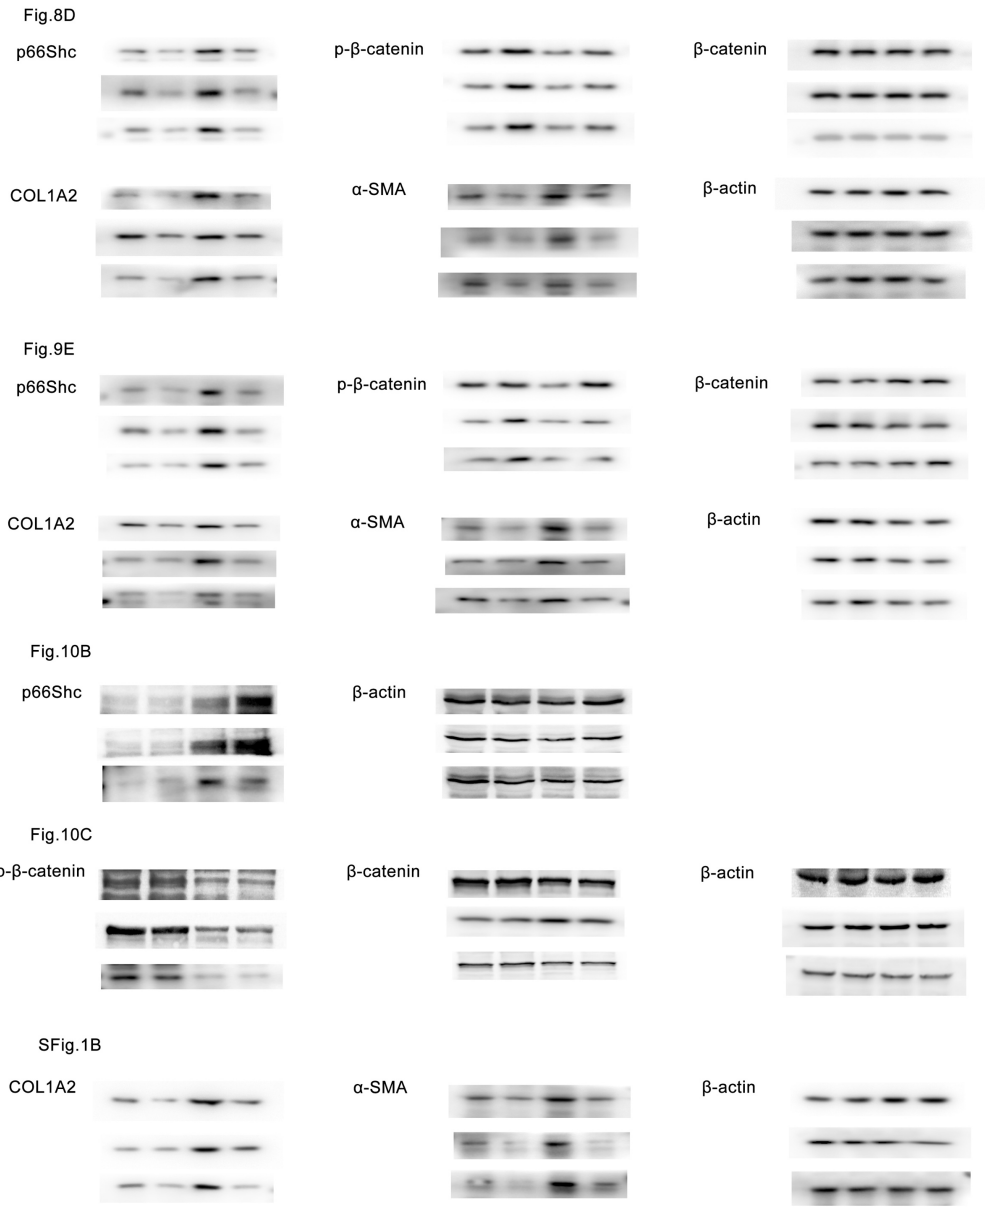

**Suppl. Fig 3:** Original western blot pictures used for statistical analyses.
